# Supplementary material for: Angioplasty induces epigenomic remodeling in injured arteries
Source: PubMed Central journal article supplement (PMC8860099; doi:10.26508/lsa.202101114), 2022-02-15

F4-C

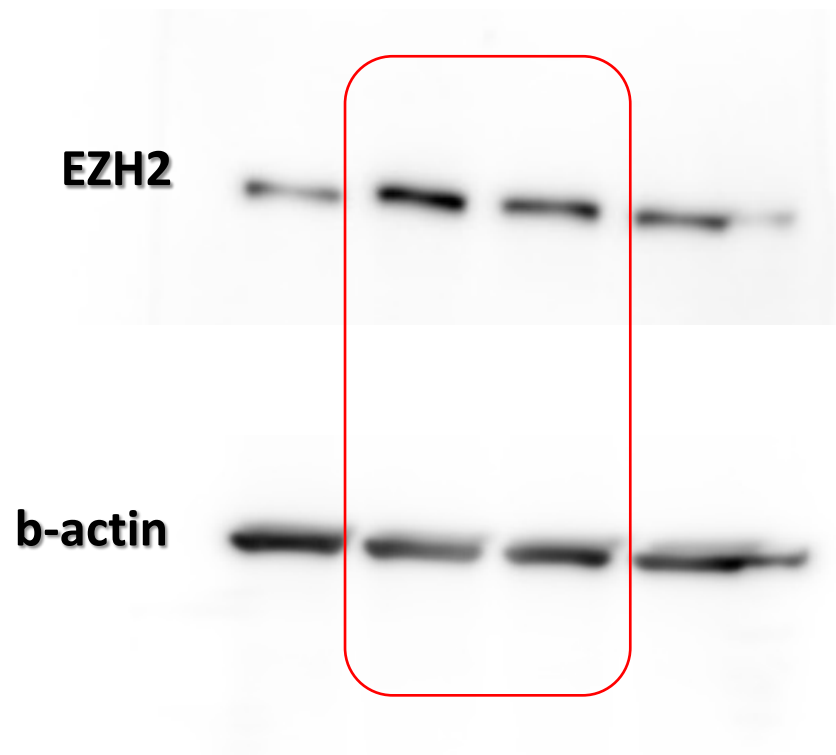

F4-E

BRD4

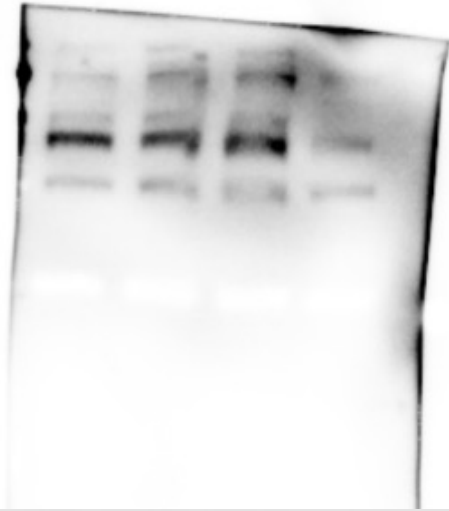

EZH2

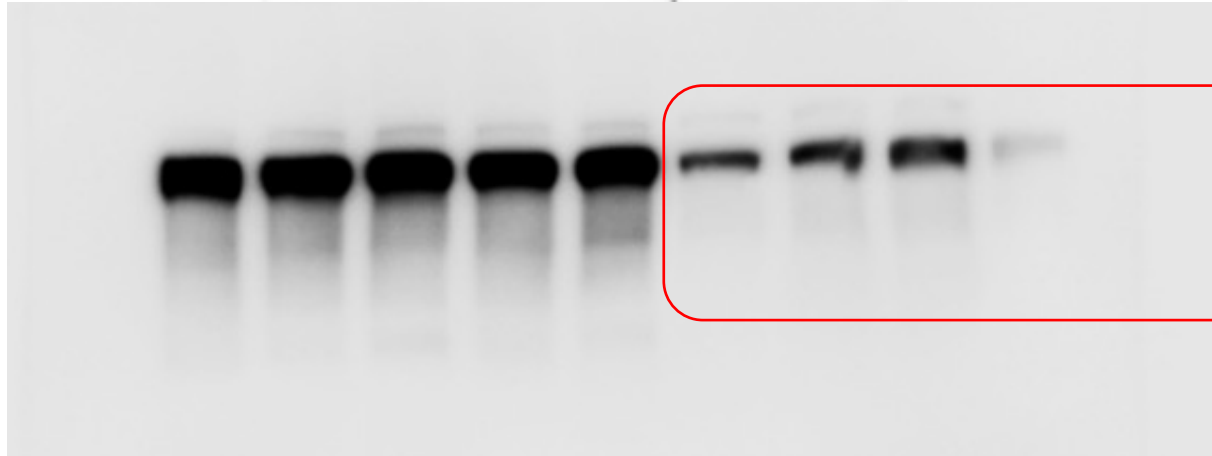

B-Actin

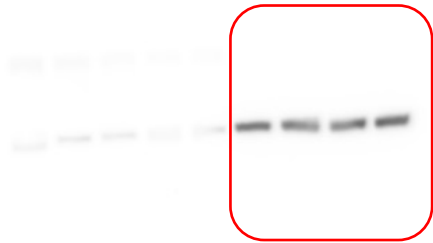

# F8-A

**EZH1**

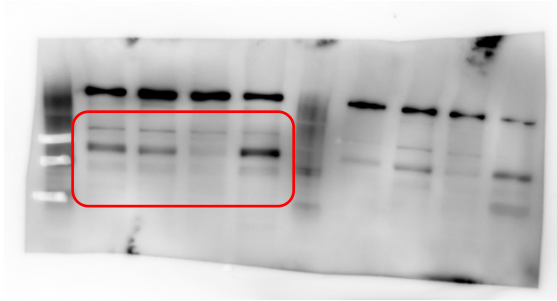

**Actin**

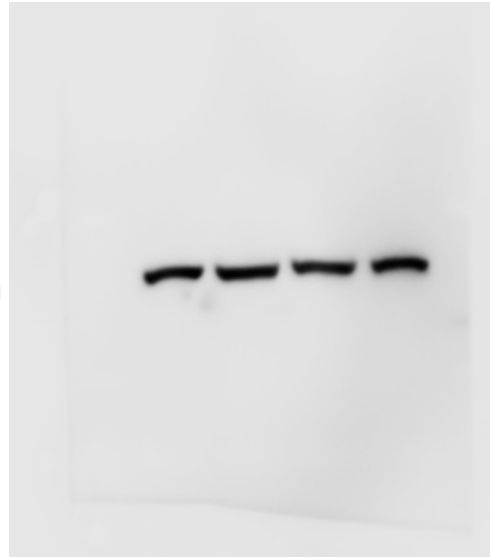

**EZH2**

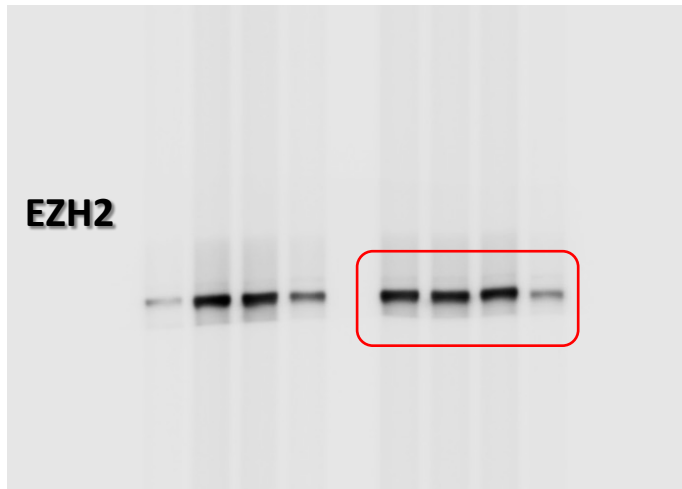

**H3K27me3**

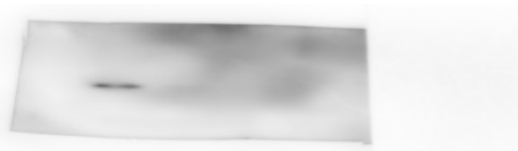

# F8-E

**EZH1**

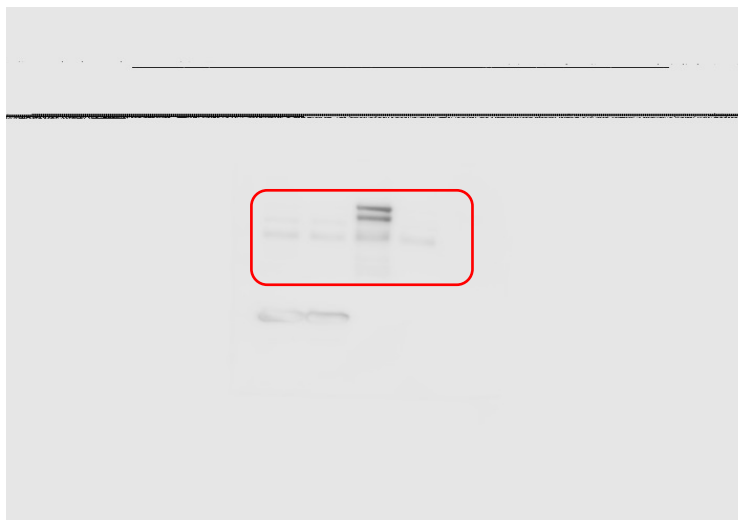

**EZH2**

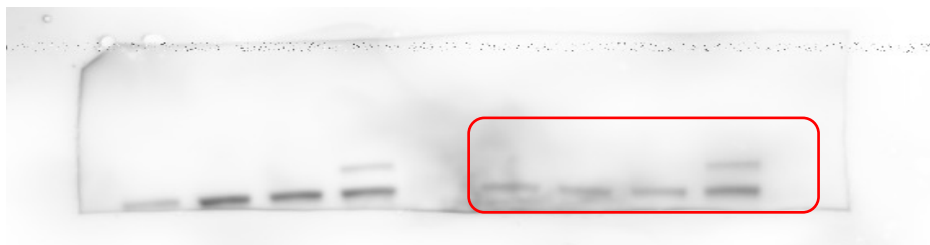

**Actin**

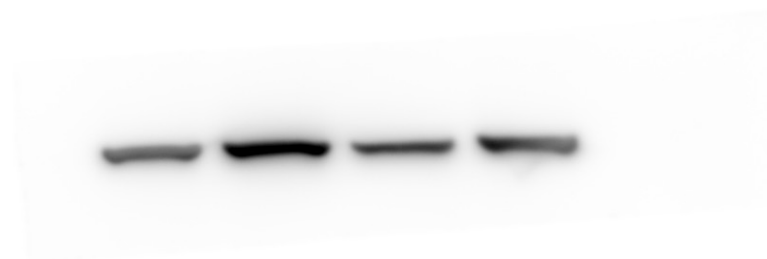

**H3K27me3**

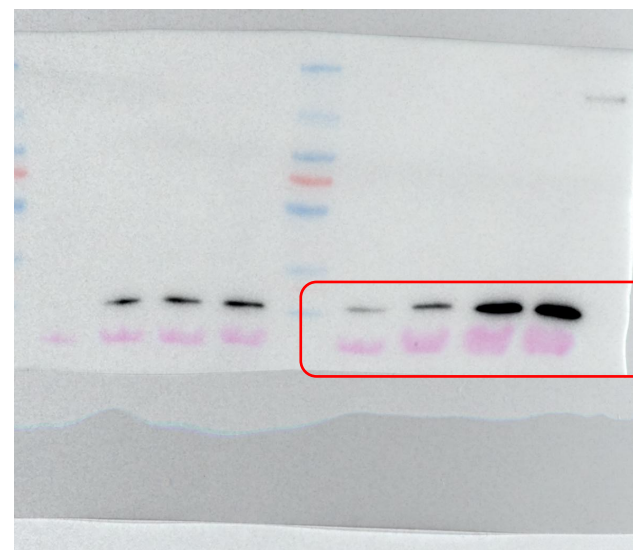

F9-A

P57

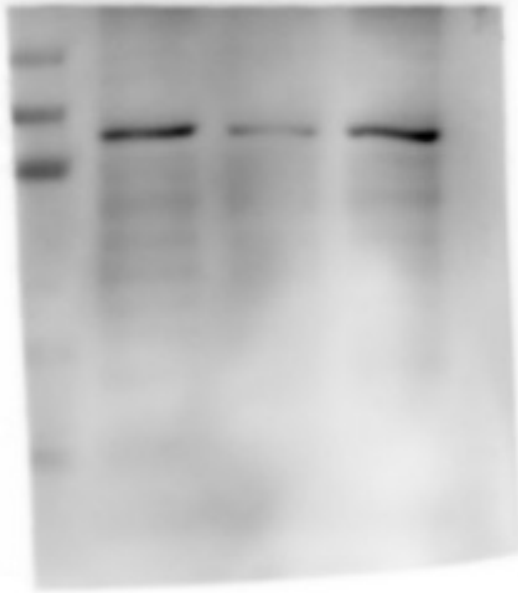

CyclinD1

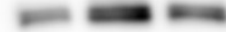

b-actin

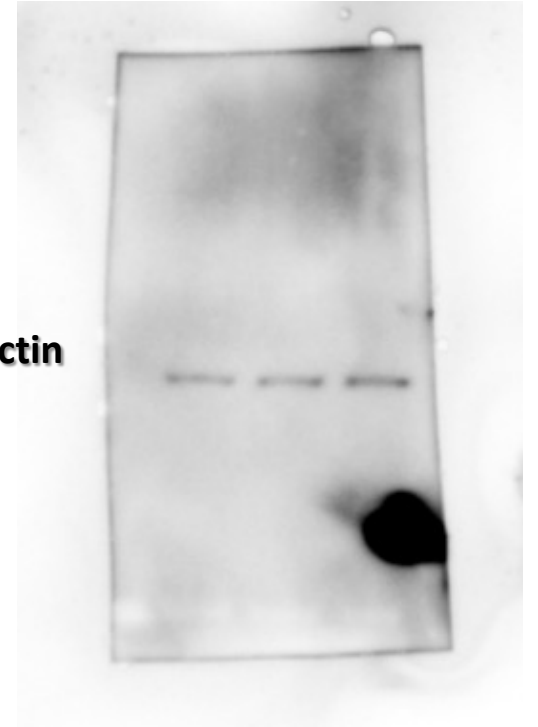

F9-D

P57

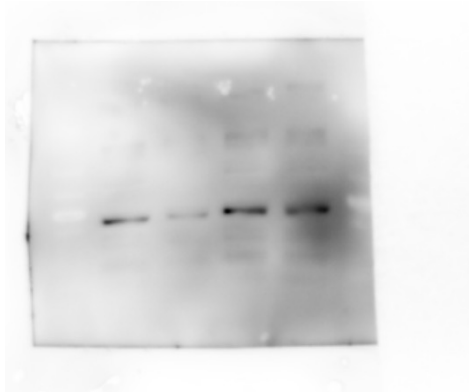

CyclinD1

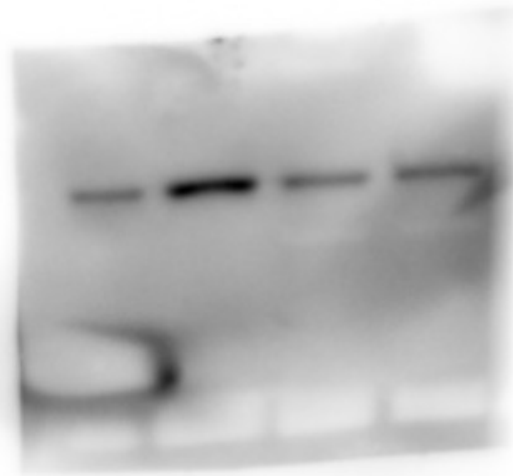

b-actin

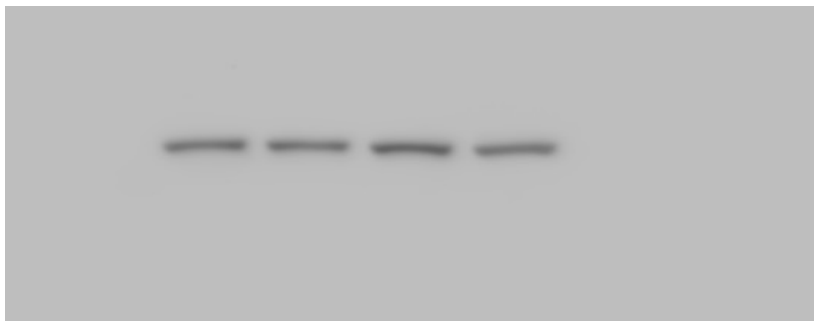

F9-G

P57

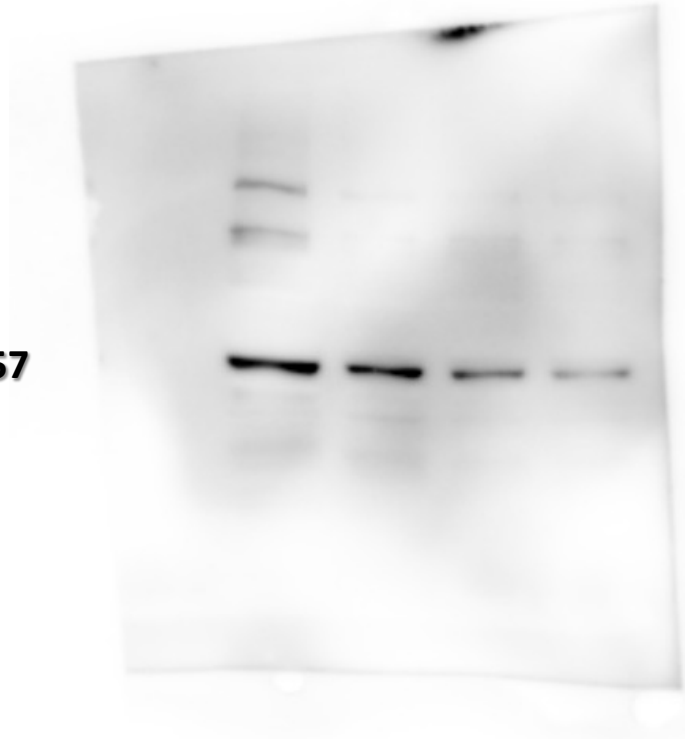

b-actin

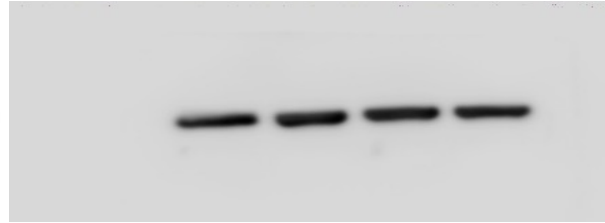

CyclinD1

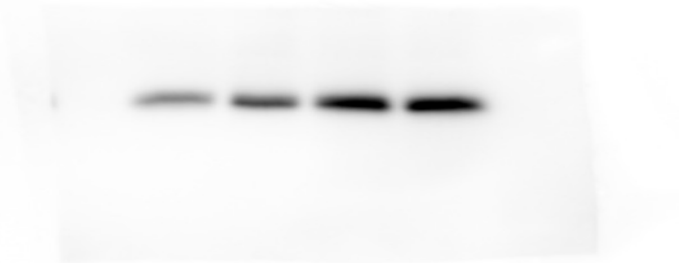

FigS6B

EZH2

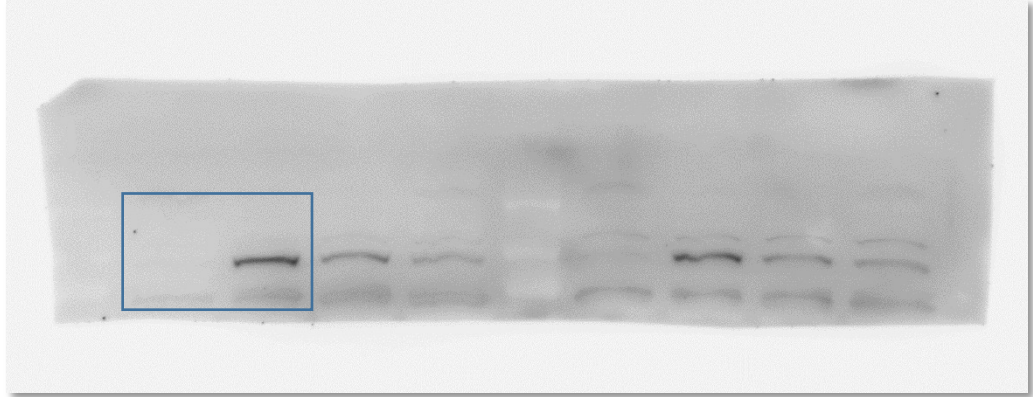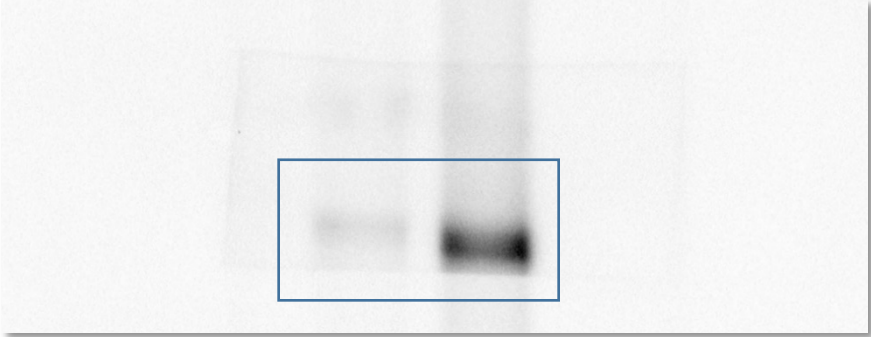

EZH1

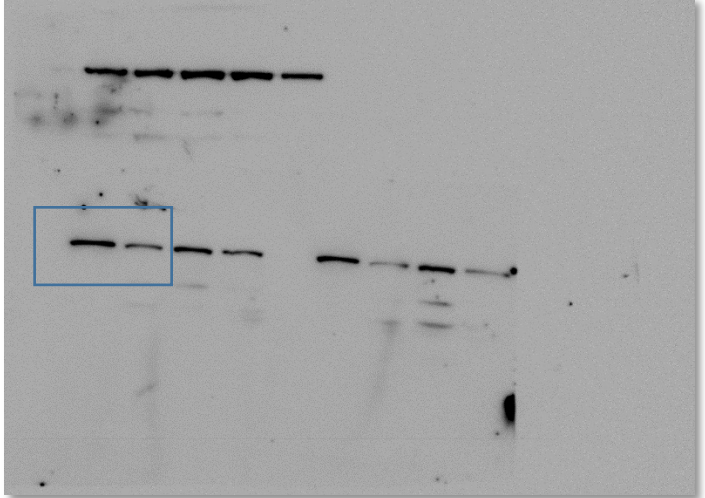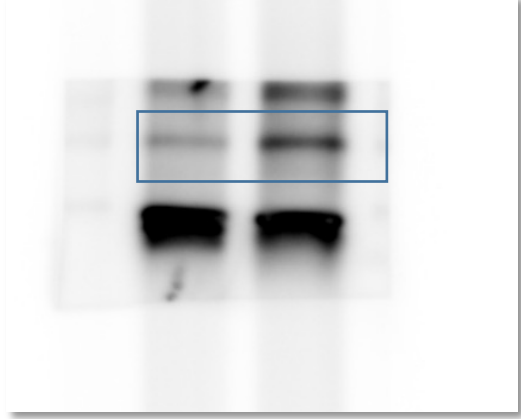

Actin

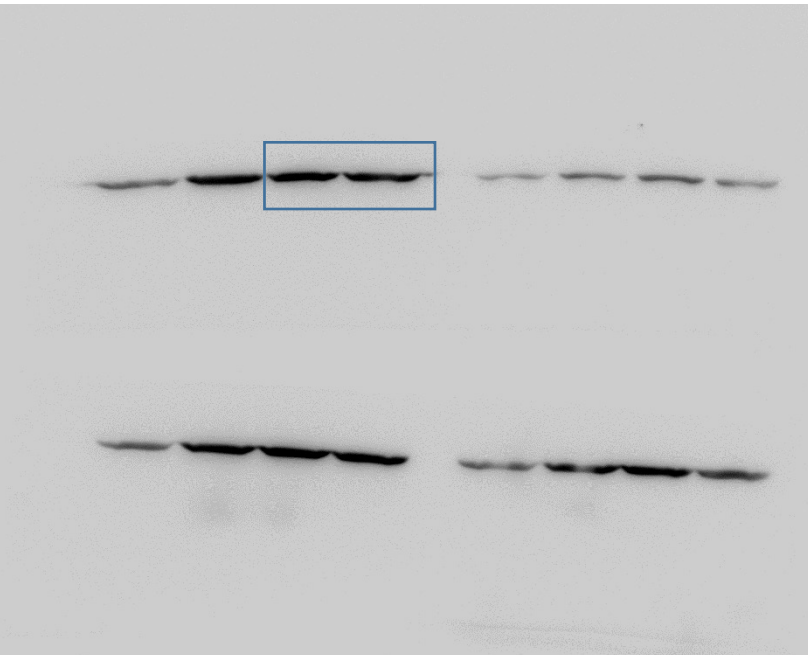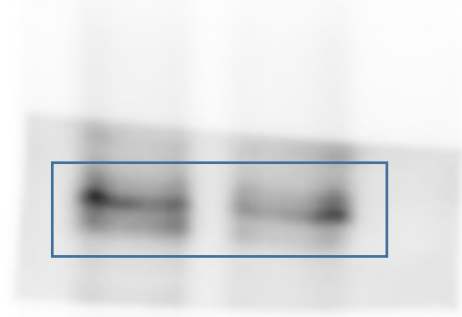

Supplement: LSA-2021-01114_SdataF4_F8_F9_FS6.pdf [file LSA-2021-01114_SdataF4_F8_F9_FS6.pdf]
